# Supplementary material for: Crystal-to-crystal interconversion of open and closed dicopper(ii) paddle wheels in a heterotrimetallic coordination polymer
Source: Royal Society of Chemistry journal article supplement (doi:10.1039/c9cc00152b), 2019-01-01
Supplement: c9cc00152b1.pdf [file c9cc00152b1.pdf]

**Electronic Supplementary Information (ESI)**

**Crystal-to-crystal interconversion of open and closed dicopper(II) paddle-wheels in a heterotrimetallic coordination polymer**

Hayato Ohwaki, Nobuto Yoshinari, and Takumi Konno\*

*Department of Chemistry, Graduate School of Science, Osaka University, Toyonaka, Osaka 560-0043 (Japan)*

*konno@chem.sci.osaka-u.ac.jp*

## Experimental Section

### A. Preparation of $[\text{Au}_2\text{Pd}(\text{dppm})(\text{D-pen})_2]$ (**[1]**).

To a pale yellow solution containing 1.15 g (986  $\mu\text{mol}$ ) of  $[\text{Au}_2(\text{dppm})(\text{D-Hpen})_2]\cdot 5\text{H}_2\text{O}$  <sup>13</sup> in 100 mL of ethanol, 0.22 g (986  $\mu\text{mol}$ ) of  $\text{Pd}(\text{OAc})_2$  was added. The mixture was stirred at room temperature for 3 h, which gave a yellow solution. The yellow solution was evaporated to dryness, and the yellow residue was dissolved in 40 mL of ethanol/water (1:1). The yellow solution was allowed to stand at room temperature for 6 days. After filtration to remove a small amount of yellow crystalline film, 100  $\mu\text{L}$  of EtOH was added to the resulting yellow filtrate. The mixture was allowed to stand at room temperature for 2 days, which gave yellow block crystals (**[1]** $\cdot 8\text{H}_2\text{O}$ ). One of the crystals was used for the single-crystal X-ray analysis. Yield: 0.92 g (71%). Anal. Found: C, 31.78; H, 4.08; N, 2.11%. Calcd for  $[\text{Au}_2\text{Pd}(\text{dppm})(\text{D-pen})_2]\cdot 8\text{H}_2\text{O} = \text{C}_{35}\text{H}_{56}\text{N}_2\text{O}_{12}\text{P}_2\text{S}_2\text{Au}_2\text{Pd}$ : C, 31.77; H, 4.27; N, 2.12%. IR spectrum ( $\text{cm}^{-1}$ , KBr disk): 1605 ( $\nu_{\text{COO}}$ ), 1437 ( $\nu_{\text{Ph}}$ ), 1102, and 786-690 ( $\nu_{\text{P-Ph}}$ ). <sup>1</sup>H NMR spectrum (ppm from TMS, methanol-*d*<sub>4</sub>):  $\delta$  1.54 (s, 6H), 1.75 (s, 6H), 3.39 (s, 2H), 7.38-7.77 (m, 20H). <sup>31</sup>P NMR spectrum (ppm from 85%  $\text{H}_3\text{PO}_4$ , methanol-*d*<sub>4</sub>):  $\delta$  33.2 (s).

### B. Preparation of $[\text{Cu}_2(\text{H}_2\text{O})_4\{\text{Au}_2\text{Pd}(\text{dppm})(\text{D-pen})_2\}_2](\text{NO}_3)_4$ (**[2]** $(\text{NO}_3)_4$ ).

To a yellow solution containing 60 mg (45.3  $\mu\text{mol}$ ) of **[1]** $\cdot 8\text{H}_2\text{O}$  in 2 mL of ethanol, 0.1 M  $\text{Cu}(\text{NO}_3)_2$  (2.0 mL, 2.0 mmol) in a mixture of water/ethanol (v/v = 4/1) was added, which gave a blue green solution. The solution was carefully evaporated in a closed desiccator at room temperature for 6 days, which gave green block crystals (**[2]** $(\text{NO}_3)_4\cdot 4\text{H}_2\text{O}$ ). One of the crystals was used for the single-crystal X-ray analysis. Yield: 49 mg (75%). Anal. Found: C, 29.33; H, 3.34; N, 3.89%. Calcd for  $[\text{Cu}_2(\text{H}_2\text{O})_4\{\text{Au}_2\text{Pd}(\text{dppm})(\text{D-pen})_2\}_2](\text{NO}_3)_4\cdot 4\text{H}_2\text{O} = \text{C}_{70}\text{H}_{96}\text{N}_8\text{O}_{28}\text{P}_4\text{S}_4\text{Au}_4\text{Pd}_2$ : C, 29.22; H, 3.36; N, 3.89%. IR spectrum ( $\text{cm}^{-1}$ , KBr disk): 1650 and 1605 ( $\nu_{\text{COO}}$ ), 1437 ( $\nu_{\text{Ph}}$ ), 1385 ( $\nu_{\text{NO}_3}$ ), 1102, and 789-690 ( $\nu_{\text{P-Ph}}$ ).

### C. Preparation of $[\text{Cu}_2(\text{H}_2\text{O})_2\{\text{Au}_2\text{Pd}(\text{dppm})(\text{D-pen})_2\}_2](\text{NO}_3)_4$ (**[3]** $(\text{NO}_3)_4$ ).

Green crystals of **[2]** $(\text{NO}_3)_4\cdot 4\text{H}_2\text{O}$  were dried under 0.6 kPa at room temperature for 15 min to give dehydrated crystals (**[3]** $(\text{NO}_3)_4\cdot 3\text{H}_2\text{O}$ ). During this treatment, cracks occurred in the crystals. One of the single-crystal domains was used for the single-crystal X-ray analysis, from which its formula was estimated to be  $[\text{Cu}_2(\text{H}_2\text{O})_2\{\text{Au}_2\text{Pd}(\text{dppm})(\text{D-pen})_2\}_2](\text{NO}_3)_4\cdot 3\text{H}_2\text{O}$ , together with the water adsorption analysis (Figure S11). The elemental analysis of **[3]** $(\text{NO}_3)_4\cdot 3\text{H}_2\text{O}$  as well as measurement of its IR spectrum could not be carried out because crystals of **[3]** $(\text{NO}_3)_4\cdot 3\text{H}_2\text{O}$  quickly adsorb water molecules under ambient conditions to be revert back to **[2]** $(\text{NO}_3)_4\cdot 4\text{H}_2\text{O}$ .

### D. Physical Measurements.

The IR spectra were recorded on a JASCO FT/IR-4100 spectrometer using KBr disks at room temperature. The <sup>1</sup>H and <sup>31</sup>P NMR spectra were measured on a JEOL ECA-500 NMR spectrometer at room temperature using tetramethylsilane (TMS,  $\delta$  0.0 ppm) as the internal standard for <sup>1</sup>H NMR and triphenyl phosphate ( $\delta$  -17.6 ppm) as the external standard for <sup>31</sup>P NMR. The elemental analyses (C, H, N) were performed using a YANACO CHN coder MT-5

or MT-6. TG-DTA measurements were performed on a SHIMADZU DTG60 under N<sub>2</sub> gas flow (50 mL/min) using Al<sub>2</sub>O<sub>3</sub> as a reference with the scan rate of 5.0 °C/min. The X-ray fluorescence spectrometry was performed on a SHIMADZU EDX-720 spectrometer. The sorption isotherms for H<sub>2</sub>O were performed on a BELSORP-max volumetric adsorption instrument. The powder X-ray diffraction patterns were recorded under controlled temperature in the transmission mode [synchrotron radiation  $\lambda = 1.0 \text{ \AA}$ ;  $2\theta$  range = 2–78°; step width = 0.01°; data collection time = 1 min] on a diffractometer equipped with a MYTHEN microstrip X-ray detector (Dectris Ltd.) at the SPring-8 BL02B2 beamline. The crystals were loaded into a glass capillary tube (diameter = 0.3 mm). The sample was rotated during the measurements. The powder simulation patterns were generated from the single-crystal X-ray structures using Mercury 3.9. The crystals for vacuum-condition measurements were loaded into a glass capillary tube (diameter = 0.5 mm), and the glass capillary tube was connected with a rotary pump under controlled pressure monitored by a Pirani vacuum gauge. The sample was oscillated during the measurements.

### E. Magnetic susceptibility measurements.

Magnetic susceptibility data were collected for crystalline samples on a QUANTUM DESIGN MPMS SQUID magnetometer at temperatures ranging from 2 to 300 K under an applied magnetic field of 5000 Oe. The magnetic susceptibility data were analyzed by a least-square fitting based on the Van Vleck model considering temperature independent paramagnetism (T.I.P), the spin coupling parameter ( $2J$ ), and the molar ratio of paramagnetic impurity ( $\alpha$ ).

$$\chi_M T = \frac{N_A \mu_B^2 g^2}{3k} \frac{6}{1 + \exp(-2J/kT)} (1 - \alpha) + \frac{N_A \mu_B^2 g^2}{4k} 2\alpha + T.I.P. \times T$$

The original data and simulated curves are illustrated in the same chart in Figure 3. The magnetic susceptibility data are summarized in Table S2.

### F. X-ray diffraction analysis.

The single-crystal X-ray diffraction measurement for [1] was performed on a RIGAKU FR-E Superbright rotating-anode X-ray source with Mo-target ( $\lambda = 0.71075 \text{ \AA}$ ) equipped with a RIGAKU RAXIS VII imaging plate as a detector at 200 K. The intensity data were collected by the  $\omega$  scan mode and were corrected for Lorentz polarization. Empirical absorption corrections were also applied. The single-crystal synchrotron radiation X-ray diffraction measurement for [2](NO<sub>3</sub>)<sub>4</sub> was carried out at the BL02B1 beamline in Spring-8 at 100 K ( $\lambda = 0.7 \text{ \AA}$ ). The intensity data were collected by the  $\omega$  scan mode and were corrected for Lorentz polarization. Empirical absorption corrections were also applied. The single-crystal synchrotron radiation X-ray diffraction measurement for [3](NO<sub>3</sub>)<sub>4</sub> was carried out on an ADSC Q210 CCD area detector with synchrotron radiation at the 2D beamline in the Pohang Accelerator Laboratory (PAL) at 100 K ( $\lambda = 0.63 \text{ \AA}$ ). The diffraction images were processed by using HKL3000.

The structures of the compounds were solved by direct methods using SHELXS-2014.<sup>S1</sup> The structural refinements were carried out using full matrix least-squares (SHELXL-2014).<sup>S1</sup> Hydrogen atoms were included in the calculated positions, except for those of the water molecules. The high  $R_{\text{int}}$  value of 0.175 for crystal [2](NO<sub>3</sub>)<sub>4</sub> is most likely due to the twinning

of crystal.

The crystal data are summarized in Tables S1 and S3.

**References.**

(S1) G. M. Sheldrick, *Acta Cryst.*, 2008, **A64**, 112.

## 2. Figures

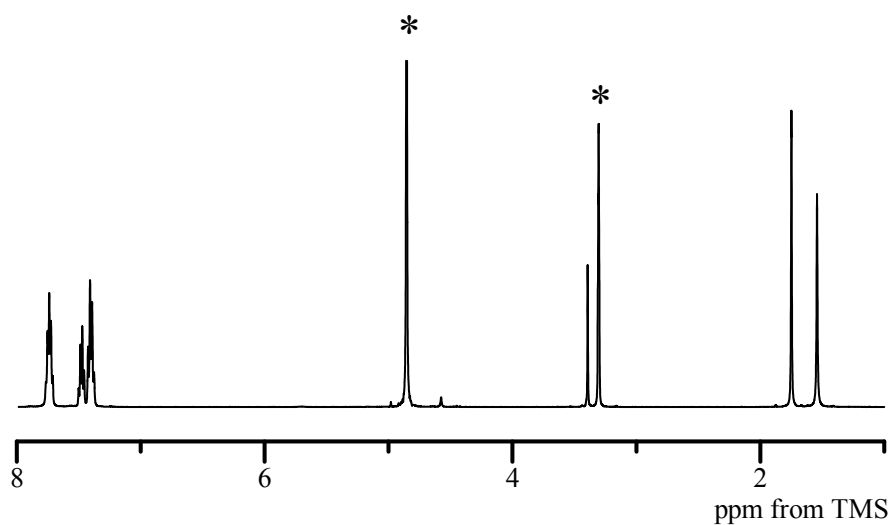

**Figure S1.**  $^1\text{H}$  NMR spectrum of [1] in methanol- $d_4$ . The spectrum was measured at 298 K. (\*) denotes the signals from solvents. The signals corresponding to the  $\text{NH}_2$  group of D-pen and the  $\text{CH}_2$  group of dppm were not observed in the spectrum, most likely due to the rapid H/D exchange for these protons.

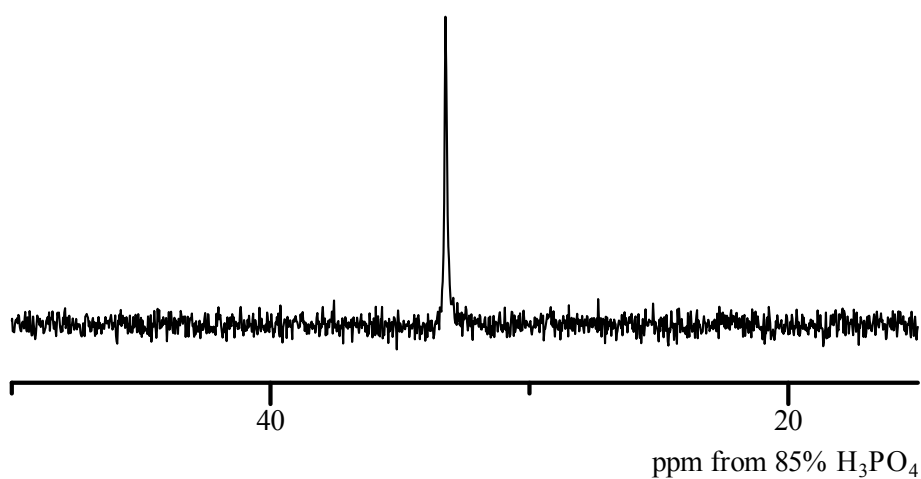

**Figure S2.**  $^{31}\text{P}$  NMR spectrum of [1] in methanol- $d_4$ . The spectrum was measured at 298 K.

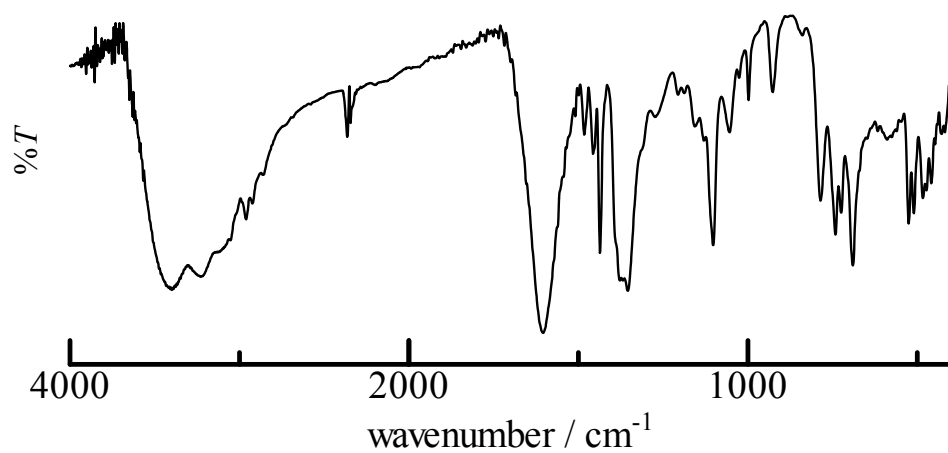

**Figure S3.** The IR spectrum of [1].

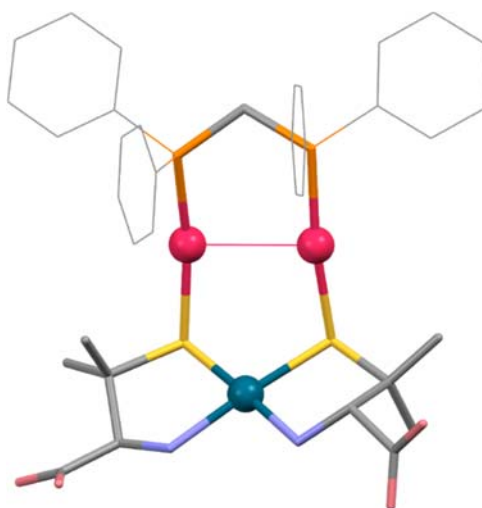

**Figure S4.** A perspective view of the molecular structure of [1]. Color code: Au, pink; Pd, blue-green; S, yellow; O, pink; N, blue; and C, gray. H atoms were omitted for clarity.

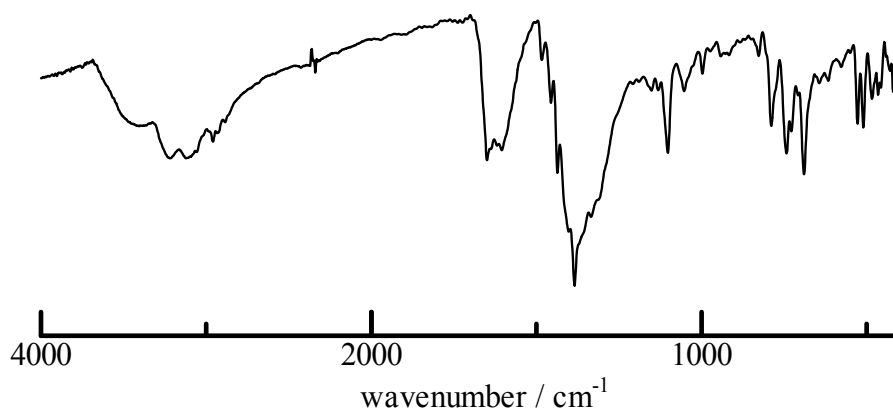

**Figure S5.** The IR spectrum of  $[2](\text{NO}_3)_4$ .

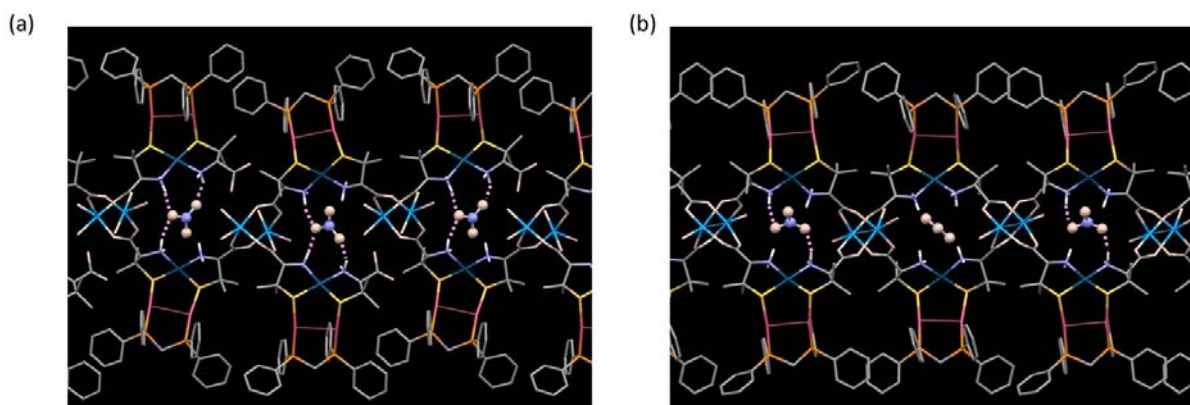

**Figure S6.** Perspective views showing the environments around nitrate ions accommodated inside the 1D coordination polymers in (a)  $[2](\text{NO}_3)_4$  and (b)  $[3](\text{NO}_3)_4$ . Pink dashed lines represent hydrogen bonds. All H atoms except for amine groups were omitted for clarity.

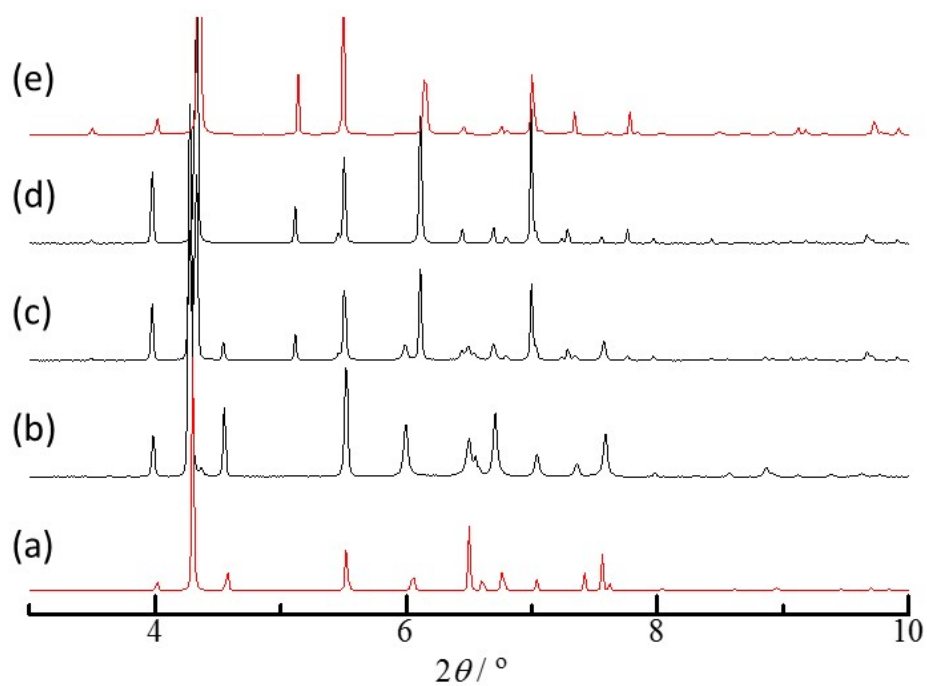

**Figure S7.** (a) The simulated PXRD pattern of  $[3](\text{NO}_3)_4$ , the observed PXRD patterns of (b) a freshly prepared sample of  $[3](\text{NO}_3)_4$ , (c) a sample after exposure to humidified air for 3 min, (d) a sample after exposure to humidified air for 8 min, and (e) the simulated PXRD pattern of  $[2](\text{NO}_3)_4$ .

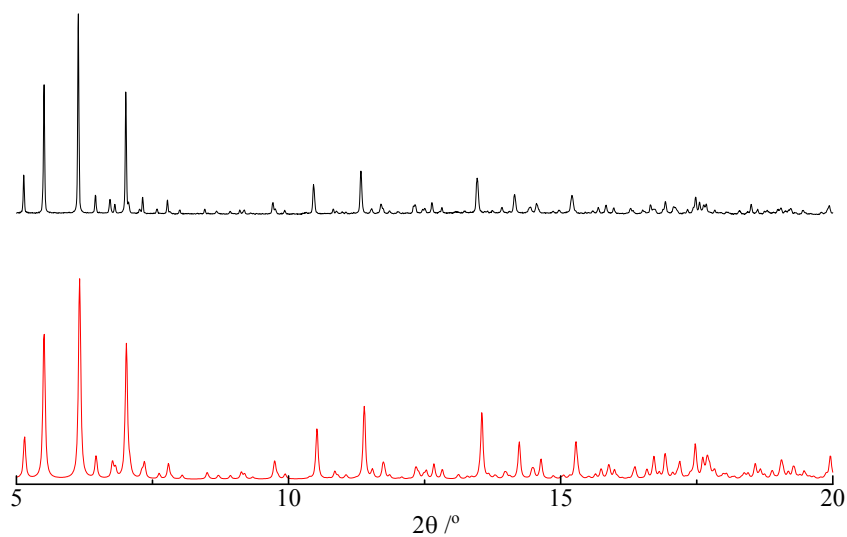

**Figure S8.** Simulated (red) and observed (black) powder X-ray diffraction patterns of  $[2](\text{NO}_3)_4$ .



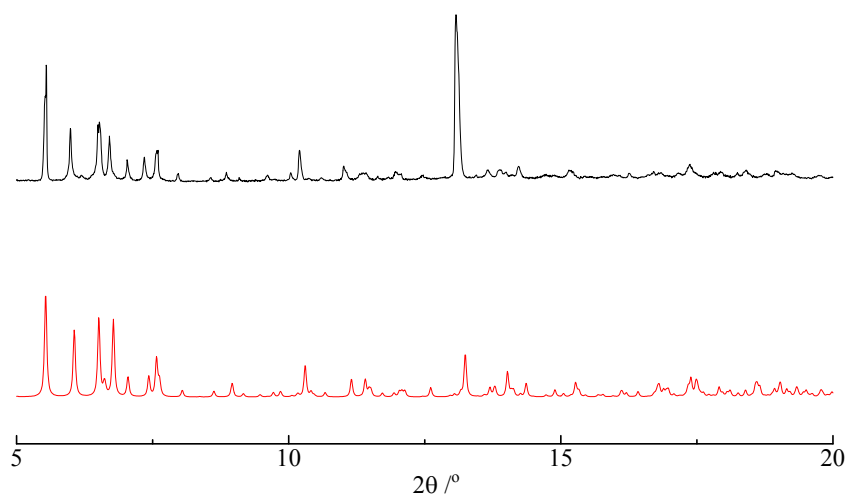

**Figure S9.** Simulated (red) and observed (black) powder X-ray diffraction patterns of  $[3](NO_3)_4$ .

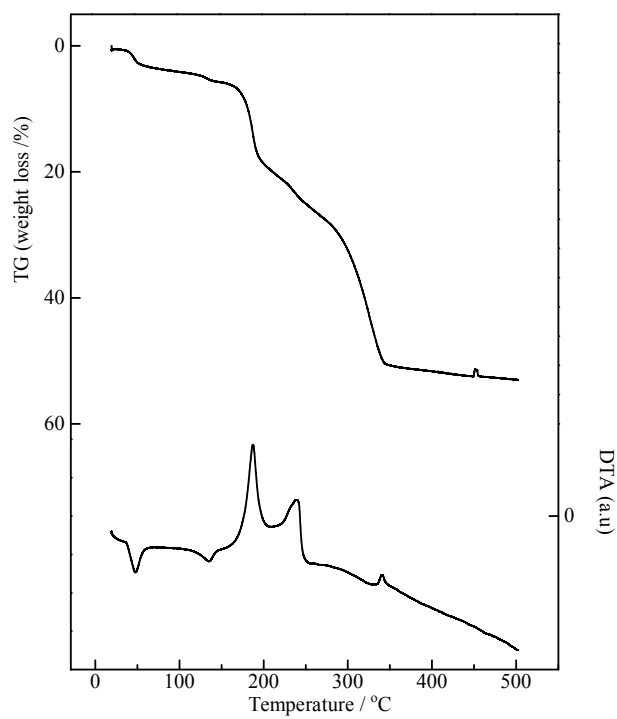

**Figure S10.** TG/DTA curves of  $[2](NO_3)_4$ .

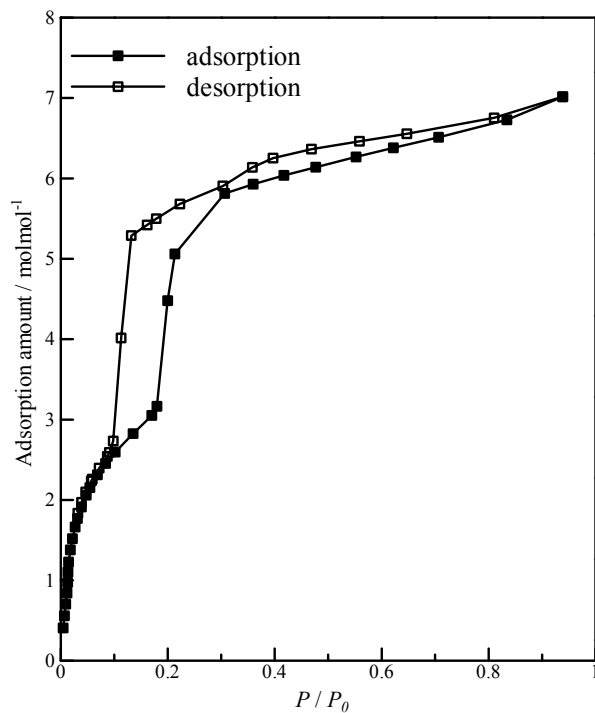

**Figure S11.** H<sub>2</sub>O vapor adsorption and desorption isotherms at 298 K for the activated sample of [2](NO<sub>3</sub>)<sub>4</sub>. The two-step hysteresis loop supports the chemical sorption of three water molecules in the framework of [2](NO<sub>3</sub>)<sub>4</sub>.

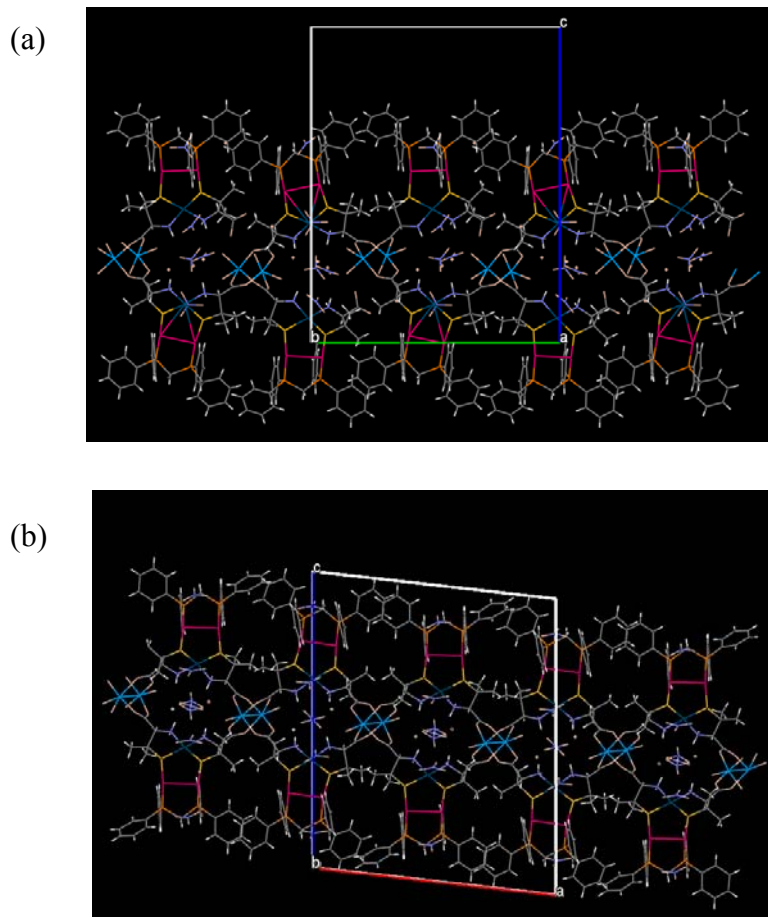

**Figure S12.** Packing views of (a)  $[2](\text{NO}_3)_4$  from *a* axis and (b)  $[3](\text{NO}_3)_4$  from *b* axis, emphasizing the transformation of crystal lattice.

**Table S1.** Effective hydrogen-bonding parameters between amine groups and nitrate ions.

| parameter  | N···O/ Å                                    | N-H···O /° |
|------------|---------------------------------------------|------------|
|            | [ <b>2</b> ](NO <sub>3</sub> ) <sub>4</sub> |            |
| N1 H1 O13  | 2.87(3)                                     | 168.2      |
| N2 H4 O15  | 3.01(4)                                     | 154.5      |
| N4 H44 O13 | 2.96(3)                                     | 164.4      |
|            | [ <b>3</b> ](NO <sub>3</sub> ) <sub>4</sub> |            |
| N4 H43 O21 | 2.84(3)                                     | 165.1      |

**Table S2.** Fitting parameters obtained from the magnetic data analysis.

| parameter                                 | [ <b>2</b> ](NO <sub>3</sub> ) <sub>4</sub><br>increasing | [ <b>2</b> ](NO <sub>3</sub> ) <sub>4</sub><br>decreasing | [ <b>3</b> ](NO <sub>3</sub> ) <sub>4</sub> |
|-------------------------------------------|-----------------------------------------------------------|-----------------------------------------------------------|---------------------------------------------|
| <i>g</i>                                  | 2.1                                                       | 2.1                                                       | 2.1                                         |
| <i>2J</i> / J                             | -114(1)                                                   | -308(1)                                                   | -288(1)                                     |
| T.I.P / cm <sup>3</sup> mol <sup>-1</sup> | 2.8(1) × 10 <sup>-4</sup>                                 | 3.7(1) × 10 <sup>-4</sup>                                 | 3.3(1) × 10 <sup>-4</sup>                   |
| <i>α</i>                                  | 0.02(1)                                                   | 0.04(1)                                                   | 0.03(1)                                     |

**Table S3.** Crystallographic data of compounds.

|                                            | [1]·11.5H <sub>2</sub> O·0.25EtOH                                                                                                 | [2](NO <sub>3</sub> ) <sub>4</sub> ·4H <sub>2</sub> O                                                                                           | [3](NO <sub>3</sub> ) <sub>4</sub> ·3H <sub>2</sub> O                                                                                           |
|--------------------------------------------|-----------------------------------------------------------------------------------------------------------------------------------|-------------------------------------------------------------------------------------------------------------------------------------------------|-------------------------------------------------------------------------------------------------------------------------------------------------|
| $\lambda$ (Å)                              | 0.71073                                                                                                                           | 0.7002                                                                                                                                          | 0.6300                                                                                                                                          |
| Formula                                    | C <sub>142</sub> H <sub>258</sub> Au <sub>8</sub> N <sub>8</sub> O <sub>63</sub> P <sub>8</sub><br>Pd <sub>4</sub> S <sub>8</sub> | C <sub>70</sub> H <sub>96</sub> Au <sub>4</sub> Cu <sub>2</sub> N <sub>8</sub> O <sub>28</sub> P <sub>4</sub><br>Pd <sub>2</sub> S <sub>4</sub> | C <sub>70</sub> H <sub>90</sub> Au <sub>4</sub> Cu <sub>2</sub> N <sub>8</sub> O <sub>25</sub> P <sub>4</sub><br>Pd <sub>2</sub> S <sub>4</sub> |
| Color, form                                | Yellow, block                                                                                                                     | Green, block                                                                                                                                    | Green, block                                                                                                                                    |
| $M_w$                                      | 5591.12                                                                                                                           | 2877.41                                                                                                                                         | 2823.36                                                                                                                                         |
| Crystal system                             | Monoclinic                                                                                                                        | Orthorhombic                                                                                                                                    | Monoclinic                                                                                                                                      |
| Space group                                | $P2_1$                                                                                                                            | $P2_12_12_1$                                                                                                                                    | $I2$                                                                                                                                            |
| $a$ (Å)                                    | 16.2767(3)                                                                                                                        | 16.8393(17)                                                                                                                                     | 20.842(4)                                                                                                                                       |
| $b$ (Å)                                    | 37.3828(7)                                                                                                                        | 20.715(2)                                                                                                                                       | 17.342(4)                                                                                                                                       |
| $c$ (Å)                                    | 16.9637(3)                                                                                                                        | 26.283(3)                                                                                                                                       | 25.184(5)                                                                                                                                       |
| $\alpha$ (°)                               | 90                                                                                                                                | 90                                                                                                                                              | 90                                                                                                                                              |
| $\beta$ (°)                                | 99.887(7)                                                                                                                         | 90                                                                                                                                              | 96.43(3)                                                                                                                                        |
| $\gamma$ (°)                               | 90                                                                                                                                | 90                                                                                                                                              | 90                                                                                                                                              |
| $V$ (Å <sup>3</sup> )                      | 10168.6(4)                                                                                                                        | 9167.9(17)                                                                                                                                      | 9045(4)                                                                                                                                         |
| $Z$                                        | 2                                                                                                                                 | 4                                                                                                                                               | 4                                                                                                                                               |
| $T$ (K)                                    | 200(2)                                                                                                                            | 100(2)                                                                                                                                          | 100(2)                                                                                                                                          |
| $R_{\text{int}}$                           | 0.0548                                                                                                                            | 0.1746                                                                                                                                          | 0.0928                                                                                                                                          |
| F(000)                                     | 5468                                                                                                                              | 5544                                                                                                                                            | 5424                                                                                                                                            |
| $\rho$ calcd (g cm <sup>-3</sup> )         | 1.826                                                                                                                             | 2.085                                                                                                                                           | 2.073                                                                                                                                           |
| $\mu$ (Mo K $\alpha$ ) (mm <sup>-1</sup> ) | 6.313                                                                                                                             | 7.126                                                                                                                                           | 5.490                                                                                                                                           |
| Crystal size (mm <sup>3</sup> )            | 0.16×0.16×0.16                                                                                                                    | 0.06×0.03×0.03                                                                                                                                  | 0.05×0.04×0.03                                                                                                                                  |
| Limiting indices                           | -20 ≤ h ≤ 18<br>-48 ≤ k ≤ 48<br>-22 ≤ l ≤ 21                                                                                      | -21 ≤ h ≤ 21<br>-24 ≤ k ≤ 26<br>-34 ≤ l ≤ 33                                                                                                    | -32 ≤ h ≤ 32<br>-27 ≤ k ≤ 27<br>-39 ≤ l ≤ 39                                                                                                    |
| $R1$ ( $I > 2\sigma(I)$ ) <sup>a)</sup>    | 0.0576                                                                                                                            | 0.0807                                                                                                                                          | 0.0625                                                                                                                                          |
| w $R2$ (all data) <sup>b)</sup>            | 0.0809                                                                                                                            | 0.1742                                                                                                                                          | 0.1536                                                                                                                                          |
| GOF                                        | 1.021                                                                                                                             | 0.924                                                                                                                                           | 0.873                                                                                                                                           |
| Flack                                      | 0.051(4)                                                                                                                          | -0.017(10)                                                                                                                                      | 0.010(5)                                                                                                                                        |

a)  $R1 = \Sigma||F_o| - |F_c|| / \Sigma|F_o|$ .

b)  $wR2 = [\Sigma(w(F_o^2 - F_c^2)^2) / \Sigma w(F_o^2)^2]^{1/2}$ .
